# Supplementary material for: PDZ Domain-Mediated Interactions of G Protein-Coupled Receptors with Postsynaptic Density Protein 95: Quantitative Characterization of Interactions
Source: PubMed Central journal article supplement (PMC3653948; doi:10.1371/journal.pone.0063352), 2013-05-14
Supplement: pone.0063352.s004.pdf [file pone.0063352.s004.pdf]

**Table S1.** Sequences of C-terminal tail peptides used for fluorescence polarization and surface plasmon resonance experiments.

| <b>Protein</b>                     | <b>Species</b> | <b>Family</b>                    | <b>C-tail sequence</b> | <b>Class</b> |
|------------------------------------|----------------|----------------------------------|------------------------|--------------|
| <b>Reference proteins</b>          |                |                                  |                        |              |
| CRIPT                              | Human          | CRIPT                            | LDTKNYKQTSV            | I            |
| GluN2B                             | Human          | Glutamate gated ion channel      | YEKLSSIESDV            | I            |
| KIF1B $\alpha$                     | Human          | Kinesin-like                     | NLKAGRETTV             | I            |
| <b>G protein-coupled receptors</b> |                |                                  |                        |              |
| 5-HTR <sub>2A</sub>                | Human          | 5-hydroxytryptamine receptors    | DGVNEKVSCV             | I            |
| 5-HTR <sub>2C</sub>                | Human          | 5-hydroxytryptamine receptors    | SVVSERISSV             | I            |
| 5-HTR <sub>4(a)</sub>              | Human          | 5-hydroxytryptamine receptors    | NDPESLESCF             | I            |
| A <sub>2B</sub>                    | Human          | Adenosine receptors              | GVQPALGVGL             | II           |
| $\beta$ <sub>1</sub> AR            | Human          | Adrenergic receptors             | RPGFASESKV             | I            |
| $\beta$ <sub>2</sub> AR            | Human          | Adrenergic receptors             | RNCSTNDSL              | I            |
| CCR5                               | Human          | Chemokine receptors              | TGEQEISVGL             | II           |
| CCR5                               | Mouse          | Chemokine receptors              | TGEHEVSTGL             | I            |
| CXCR1                              | Human          | Chemokine receptors              | SSSVNVSSNL             | I            |
| CXCR2                              | Human          | Chemokine receptors              | SSSGHTSTTL             | I            |
| CXCR3                              | Human          | Chemokine receptors              | ETSEASYSGL             | I            |
| CXCR4                              | Human          | Chemokine receptors              | ESESSSFHSS             |              |
| CXCR5                              | Human          | Chemokine receptors              | SENATSLTTF             | I            |
| BAI1                               | Human          | Class B orphans                  | QDIIDLQTEV             | I            |
| Ghrelin                            | Human          | Ghrelin receptor                 | RAWTESSINT             |              |
| LPA <sub>2</sub>                   | Human          | Lysophospholipid receptors       | GHPLMDSTL              | I            |
| mGlu <sub>1(a)</sub>               | Human          | Metabotropic glutamate receptors | RDYKQSSSTL             | I            |
| mGlu <sub>2</sub>                  | Human          | Metabotropic glutamate receptors | EVVDSTTSSL             | I            |
| mGlu <sub>5(b)</sub>               | Human          | Metabotropic glutamate receptors | RDYTQSSSSL             | I            |
| mGlu <sub>7(a)</sub>               | Human          | Metabotropic glutamate receptors | KYVSYNNLVI             | II           |
| Y <sub>2</sub>                     | Human          | Neuropeptide Y receptors         | NDSFTEATNV             | I            |
| $\delta$ OR                        | Human          | Opioid receptors                 | SDGPGGAAA              | II           |
| $\kappa$ OR                        | Human          | Opioid receptors                 | RDIDGMNKPV             |              |
| $\mu$ OR-1A                        | Human          | Opioid receptors                 | DRTNHQVRSL             |              |
| $\mu$ OR-1B2                       | Human          | Opioid receptors                 | QRERRQKSDW             | I            |
| $\mu$ OR-1B5                       | Human          | Opioid receptors                 | QSPFPFPGRV             |              |
| P2Y <sub>1</sub>                   | Human          | P2Y receptors                    | EFKQNGDTSL             | I            |
| SSTR1                              | Human          | Somatostatin receptors           | GTCTSRITTL             | I            |
| SSTR1                              | Mouse          | Somatostatin receptors           | GTCASRISTL             | I            |
| SSTR2A                             | Human          | Somatostatin receptors           | LLNGDLQTSI             | I            |
| SSTR3                              | Human          | Somatostatin receptors           | KSSTMRI SYL            | I            |
| SSTR4                              | Human          | Somatostatin receptors           | RIPLTRTTTF             | I            |
| SSTR4                              | Mouse          | Somatostatin receptors           | QVPFTKT TTF            | I            |
| SSTR5                              | Human          | Somatostatin receptors           | ANGLMQTSKL             | I            |
