# Supplementary material for: PDZ Domain-Mediated Interactions of G Protein-Coupled Receptors with Postsynaptic Density Protein 95: Quantitative Characterization of Interactions
Source: PubMed Central journal article supplement (PMC3653948; doi:10.1371/journal.pone.0063352), 2013-05-14
Supplement: pone.0063352.s005.pdf [file pone.0063352.s005.pdf]

**Table S2.** Comparison of  $K_i$  values for reference protein interactions with  $K_i$  and  $K_d$  values from the literature.

| Competitor     | Species | Family                      | $K_i$ ( $\mu\text{M}$ ) <sup>a,b</sup> |                |                      |                  |                      |                  |
|----------------|---------|-----------------------------|----------------------------------------|----------------|----------------------|------------------|----------------------|------------------|
|                |         |                             | PDZ1                                   |                | PDZ2                 |                  | PDZ3                 |                  |
|                |         |                             | Literature                             | Result         | Literature           | Result           | Literature           | Result           |
| CRIPT          | Human   | CRIPT                       | $97 \pm 18^{c,d}$                      | $76 \pm 6.7$   | $25 \pm 1.6^{c,d}$   | $25 \pm 2.5$     | $2.1 \pm 0.15^{c,d}$ | $2.9 \pm 0.01^c$ |
| GluN2B         | Human   | Glutamate gated ion channel | $18 \pm 0.92^{c,d}$                    | $29 \pm 2.5^c$ | $4.1 \pm 0.17^{c,d}$ | $5.5 \pm 0.89^c$ | NA <sup>d</sup>      | NA               |
| KIF1B $\alpha$ | Human   | Kinesin-like                | $2.4^{e,f}$                            | $7 \pm 0.2$    | $2.1^{e,f}$          | $3.8 \pm 0.42$   | $2.7^{e,f}$          | $14 \pm 2.2$     |

<sup>a</sup>The shown data are  $K_i \pm$  fitting error, unless otherwise noted.

<sup>b</sup>NA, no affinity, defined as a  $K_i$  value above 1000  $\mu\text{M}$ .

<sup>c</sup>Shown data are mean  $K_i \pm$  standard error of the mean from two or more independent experiments.

<sup>d</sup>Bach A, Chi CN, Olsen TB, Pedersen SW, Røder MU, et al. (2008) Modified peptides as potent inhibitors of the postsynaptic density-95/*N*-methyl-D-aspartate receptor interaction. *J Med Chem* 51: 6450-6459.

<sup>e</sup> $K_d$  value.

<sup>f</sup>Stiffler MA, Chen JR, Grantcharova VP, Lei Y, Fuchs D, et al. (2007) PDZ binding selectivity is optimized across the mouse proteome. *Science* 317: 364-369.
