# Supplementary material for: PDZ Domain-Mediated Interactions of G Protein-Coupled Receptors with Postsynaptic Density Protein 95: Quantitative Characterization of Interactions
Source: PubMed Central journal article supplement (PMC3653948; doi:10.1371/journal.pone.0063352), 2013-05-14
Supplement: pone.0063352.s006.pdf [file pone.0063352.s006.pdf]

**Table S3.** GPCRs found not to interact with PSD-95 using fluorescence polarization.

| <b>Competitor</b>     | <b>Species</b> | <b>Family</b>                    |
|-----------------------|----------------|----------------------------------|
| 5-HTR <sub>4(a)</sub> | Human          | 5-Hydroxytryptamine receptors    |
| A <sub>2B</sub>       | Human          | Adenosine receptors              |
| CCR5                  | Human          | Chemokine receptors              |
| CCR5                  | Mouse          | Chemokine receptors              |
| CXCR1                 | Human          | Chemokine receptors              |
| CXCR3                 | Human          | Chemokine receptors              |
| CXCR4                 | Human          | Chemokine receptors              |
| CXCR5                 | Human          | Chemokine receptors              |
| Ghrelin               | Human          | Ghrelin receptor                 |
| LPA <sub>2</sub>      | Human          | Lysophospholipid receptors       |
| mGlu <sub>2</sub>     | Human          | Metabotropic glutamate receptors |
| mGlu <sub>5(b)</sub>  | Human          | Metabotropic glutamate receptors |
| δOR                   | Human          | Opioid receptors                 |
| κOR                   | Human          | Opioid receptors                 |
| μOR-1A                | Human          | Opioid receptors                 |
| μOR-1B2               | Human          | Opioid receptors                 |
| μOR-1B5               | Human          | Opioid receptors                 |
| P2Y <sub>1</sub>      | Human          | P2Y receptors                    |
| SSTR5                 | Human          | Somatostatin receptors           |
