# Supplementary material for: PDZ Domain-Mediated Interactions of G Protein-Coupled Receptors with Postsynaptic Density Protein 95: Quantitative Characterization of Interactions
Source: PubMed Central journal article supplement (PMC3653948; doi:10.1371/journal.pone.0063352), 2013-05-14
Supplement: pone.0063352.s007.pdf [file pone.0063352.s007.pdf]

**Table S4.**  $K_d$  values for interactions with the PSD-95 PDZ domains determined by surface plasmon resonance.

| Competitor                         | Species | Family                        | $K_d$ ( $\mu\text{M}$ ) <sup>a,b</sup> |            |             |
|------------------------------------|---------|-------------------------------|----------------------------------------|------------|-------------|
|                                    |         |                               | PDZ1                                   | PDZ2       | PDZ3        |
| <b>Reference proteins</b>          |         |                               |                                        |            |             |
| CRIP1                              | Human   | CRIP1                         | ND                                     | ND         | 1.5 ± 0.055 |
| GluN2B                             | Human   | Glutamate gated ion channel   | ND                                     | 1.4 ± 0.12 | ND          |
| KIF1B $\alpha$                     | Human   | Kinesin-like                  | 2.2 ± 0.28                             | 1.1 ± 0.16 | ND          |
| <b>G protein-coupled receptors</b> |         |                               |                                        |            |             |
| 5-HTR <sub>2A</sub>                | Human   | 5-Hydroxytryptamine receptors | 630 ± 12                               | 110 ± 4.3  | ND          |
| 5-HTR <sub>2C</sub>                | Human   | 5-Hydroxytryptamine receptors | 160 ± 12                               | 62 ± 1.6   | 780 ± 31    |
| $\beta_1$ AR                       | Human   | Adrenergic receptors          | ND                                     | 180 ± 9.4  | 400 ± 27    |
| $\beta_2$ AR                       | Human   | Adrenergic receptors          | ND                                     | 2086 ± 230 | ND          |
| BAI1                               | Human   | Class B Orphans               | 120 ± 3.8                              | 74 ± 3.6   | 2400 ± 630  |
| Ghrelin                            | Human   | Ghrelin receptor              | NA                                     | NA         | NA          |
| SSTR1                              | Human   | Somatostatin receptors        | 84 ± 3.4                               | 76 ± 1.5   | ND          |
| SSTR1                              | Mouse   | Somatostatin receptors        | 270 ± 9.1                              | ND         | ND          |
| SSTR3                              | Human   | Somatostatin receptors        | ND                                     | ND         | 240 ± 7.1   |

<sup>a</sup>The shown data are  $K_d \pm$  fitting error.

<sup>b</sup>NA, no affinity. ND, not determined.
